# Supplementary material
Source: Springer Nature journal article supplement (https://www.springermedizin.de/resource/supplementary/12955_2013_1196_MOESM1_ESM.pdf/9559026)
Supplement: MOESM1 [file 9559026]

**PHASE 1: RTQ V1 (first version with  
45 items, n=1059)**

**1. CONSTRUCT VALIDITY**

- Principal Component Analysis

**2. ACCEPTABILITY AND FEASIBILITY**

- Response rate
- Missing values
- Floor and ceiling effect
- Skewness

**3. RELIABILITY**

- Inter-item correlation
- Cronbach's Alpha

**4. ITEM REDUCTION**

- Discussion with group of experts
- 13 items eliminated

**5. PROPOSITION OF A NEW VERSION**

- RTQ V2.0 (32 items)

**PHASE 2: RTQV2 (32 items,  
n=1059)**

**1. CONSTRUCT VALIDITY**

- Principal Component Analysis
- Multitrait analysis
- *Item-internal consistency*
- *Item-discriminant validity*

**3. RELIABILITY**

- Cronbach's Alpha

**2. CONVERGENT VALIDITY**

- SF-36 correlations

**4. UNIDIMENSIONALITY**

- Rash analysis: Partial Credit Model

**PHASE 3: RTQV2 (n=1591)**

**CONSTRUCT VALIDITY**

- Confirmatory Factor Analysis
